# Supplementary material for: The Association of Cyberbullying with Major Depressive Disorders among Bangladeshi Female Adolescents: Findings from the Bangladesh Adolescent Health and Wellbeing Survey 2019-20
Source: Research Square preprint supplement (doi:10.21203/rs.3.rs-6274564/v1), 2025-04-23
Supplement: Supplementary file 1 [file 56170ff8e5b4aae5ade26fe1.docx]

**Supplementary**

**Table S1: Factors associated with MDD among female adolescents in Bangladesh.**

| **Variables** | **AOR** | **p-value** |
| --- | --- | --- |
| **Experienced cyberbullying** |  |  |
| No | **ref** |  |
| Yes | 3.97 (3.12 to 5.05) | <0.001 |
| **Age** |  |  |
| 15 | **ref** |  |
| 16 | 1.02 (0.76 to 1.36) | 0.895 |
| 17 | 1.35 (1.01 to 1.82) | 0.046 |
| 18 | 1.09 (0.8 to 1.5) | 0.579 |
| 19 | 1.75 (1.26 to 2.42) | 0.001 |
| **Marital Status** |  |  |
| Never Married |  |  |
| Ever married | 1.24 (1 to 1.54) | 0.046 |
| **Currently Working** |  |  |
| No | **ref** |  |
| Yes | 1.4 (1.05 to 1.87) | 0.022 |
| **Years of schooling** |  |  |
| <= 5 years | **ref** |  |
| 6 to 9 years | 0.67 (0.52 to 0.85) | 0.001 |
| 10 or more years | 0.53 (0.4 to 0.71) | <0.001 |
| **Wealth index** |  |  |
| Poor | **ref** |  |
| Middle | 0.82 (0.65 to 1.04) | 0.098 |
| Rich | 0.78 (0.64 to 0.95) | 0.015 |
| **Own phone** |  |  |
| No | **ref** |  |
| Yes | 0.89 (0.72 to 1.1) | 0.273 |
| **Used Facebook** |  |  |
| No | **ref** |  |
| Yes | 1.42 (1.11 to 1.81) | 0.005 |
| **Area of residence** |  |  |
| Rural |  |  |
| Urban | 1.17 (0.95 to 1.44) | 0.138 |
| **Division** |  |  |
| Dhaka | **ref** |  |
| Barisal | 1.31 (0.9 to 1.9) | 0.159 |
| Chittagong | 1.32 (1 to 1.72) | 0.046 |
| Khulna | 1.25 (0.9 to 1.72) | 0.182 |
| Rajshahi | 0.65 (0.46 to 0.93) | 0.017 |
| Rangpur | 1.09 (0.79 to 1.5) | 0.618 |
| Sylhet | 1.43 (0.97 to 2.12) | 0.069 |
| Mymensingh | 1.66 (1.19 to 2.31) | 0.003 |
